# Supplementary material for: Driver Genetic Mutations in Spinal Cord Gliomas Direct the Degree of Functional Impairment in Tumor-Associated Spinal Cord Injury
Source: Cells. 2021 Sep 24;10(10):2525. doi: 10.3390/cells10102525 (PMC8533877; doi:10.3390/cells10102525)
Supplement: Supplementary file 1 [file cells-10-02525-s001.zip › cells-1339300-supplementary.pdf]

## Supporting information

### Driver genetic mutations in spinal cord gliomas direct the degree of functional impairment in tumor-associated spinal cord injury

Yoshitaka Nagashima<sup>1</sup>, Yusuke Nishimura<sup>1</sup>, Fumiharu Ohka<sup>1</sup>, Kaoru Eguchi<sup>2</sup>, Kosuke Aoki<sup>1</sup>, Hiroshi Ito<sup>1</sup>, Tomoya Nishii<sup>1</sup>, Takahiro Oyama<sup>1</sup>, Masahito Hara<sup>3</sup>, Yotaro Kitano<sup>1,4</sup>, Hirano Masaki<sup>1,5</sup>, Toshihiko Wakabayashi<sup>1</sup>, Atsushi Natsume<sup>1+</sup>

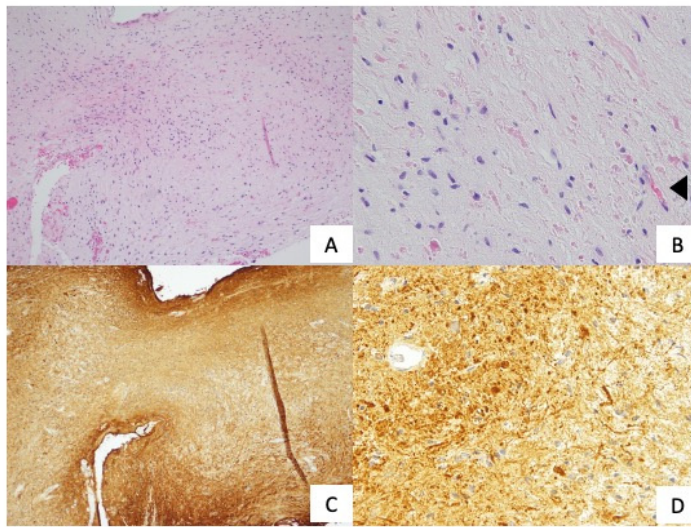

Supplementary Figure S1. Pathological images of WHO grade I pilocytic astrocytoma (Case #2): Pathological images showed alternating compact and loose growth patterns which called biphasic pattern (A: Hematoxylin and eosin stain, X100). Thick, elongated, eosinophilic, corkscrew-shaped Rosenthal fiber was found in the compact regions (B: Hematoxylin and eosin stain, X400). GFAP (Glial fibrillary acidic protein) is positive in tumor cells (C: GFAP, X100, D: GFAP, X400).
